# Supplementary material for: Accumulation of Fat Not Responsible for Femoral Head Necrosis, Revealed by Single-Cell RNA Sequencing: A Preliminary Study
Source: MDPI journal article supplement (doi:10.3390/biom13010171), 2023-01-13
Supplement: s1 [file s1]

Supplementary Materials

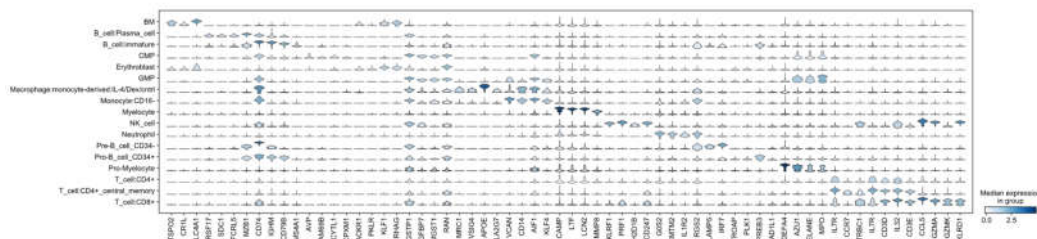

Figure S1. Marker genes defining 17 cell types.

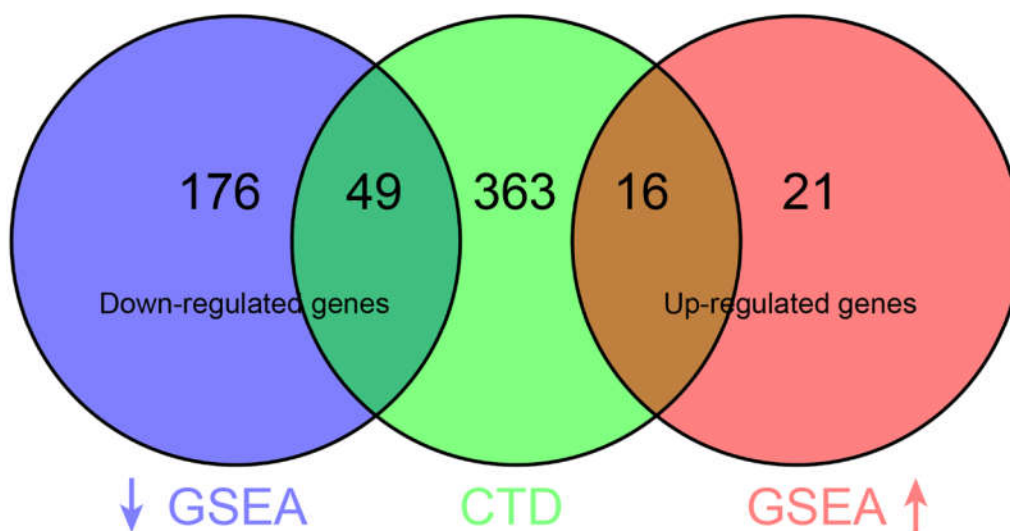

Figure S2. 65 common targeted genes of glucocorticoid, including 16 upregulated genes and 49 down-regulated genes, obtained from the intersection of Comparative Toxicogenomics Database (CTD) and Gene Set Enrichment Analysis (GSEA) Database.

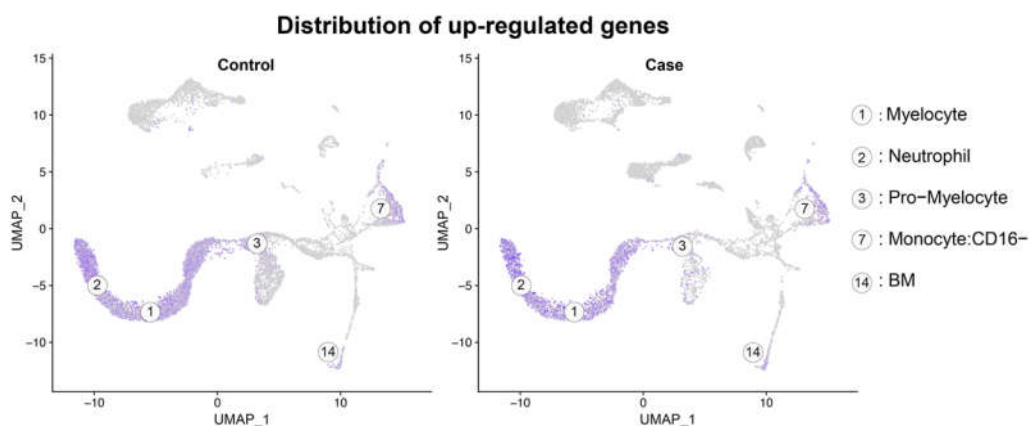

Figure S3. The distribution of 16 glucocorticoid-induced up-regulated genes in control and case group.

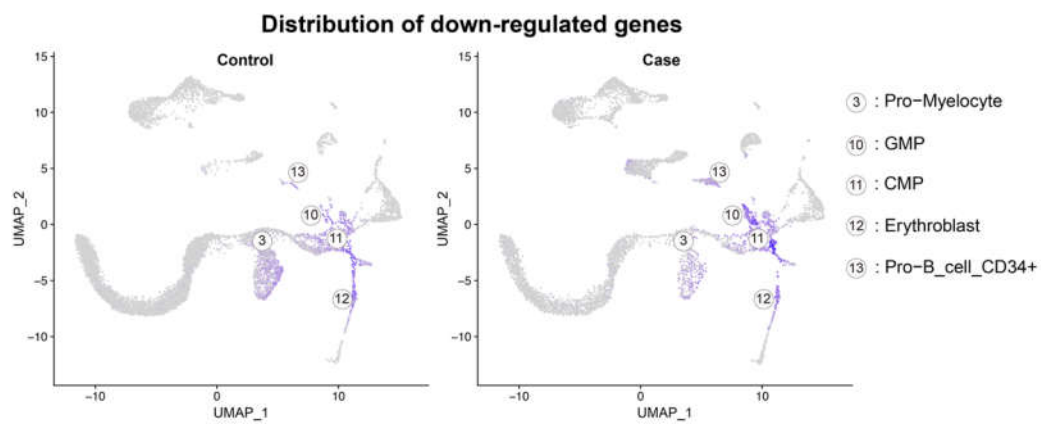

**Figure S4.** The distribution of 49 glucocorticoid-induced down-regulated genes in control and case group.

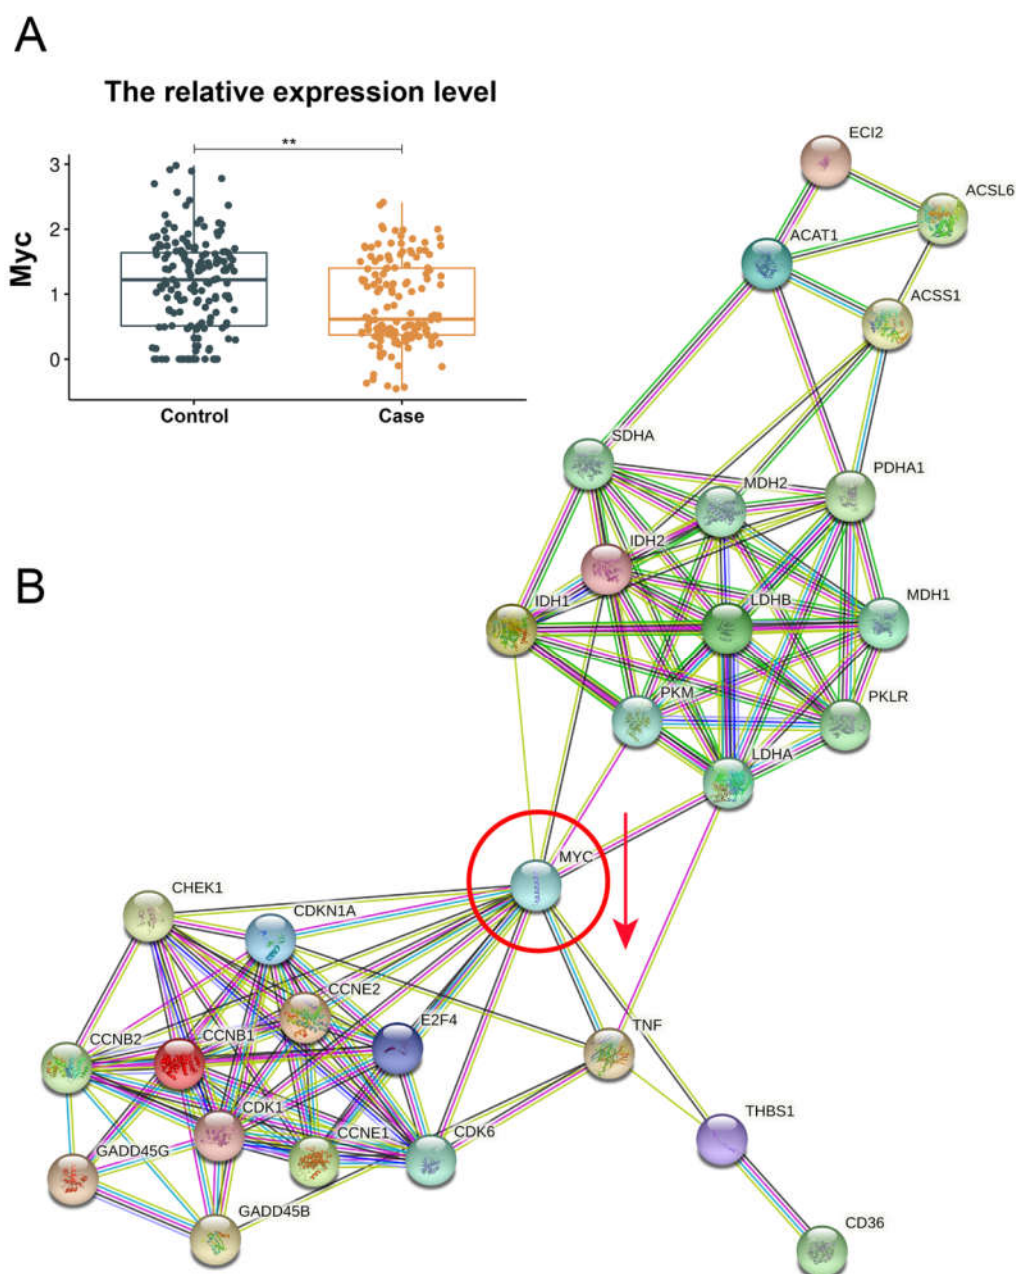

**Figure S5. The network of 29 differentially expressed genes in erythroblast.** The relative lower expression level of *Myc* in the case group compared with that in the control group (A). The protein-protein interaction network of 29 differentially expressed genes in erythroblast, and every gene plays a role in at least two signaling pathways of glucose and fat metabolism correlative (B). *Myc* serves as a network hub.

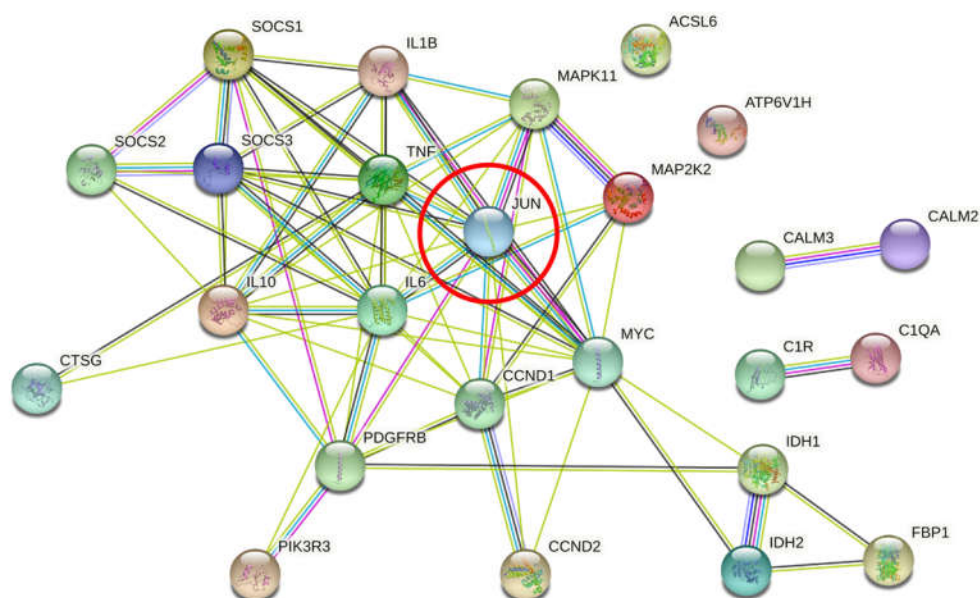

**Figure S6.** The protein-protein interaction of 25 differentially expressed genes in monocyte derived macrophages. Every gene plays a role in at least two inflammation response related signaling pathways. *Jun* serves as the network hub of the inflammatory response.

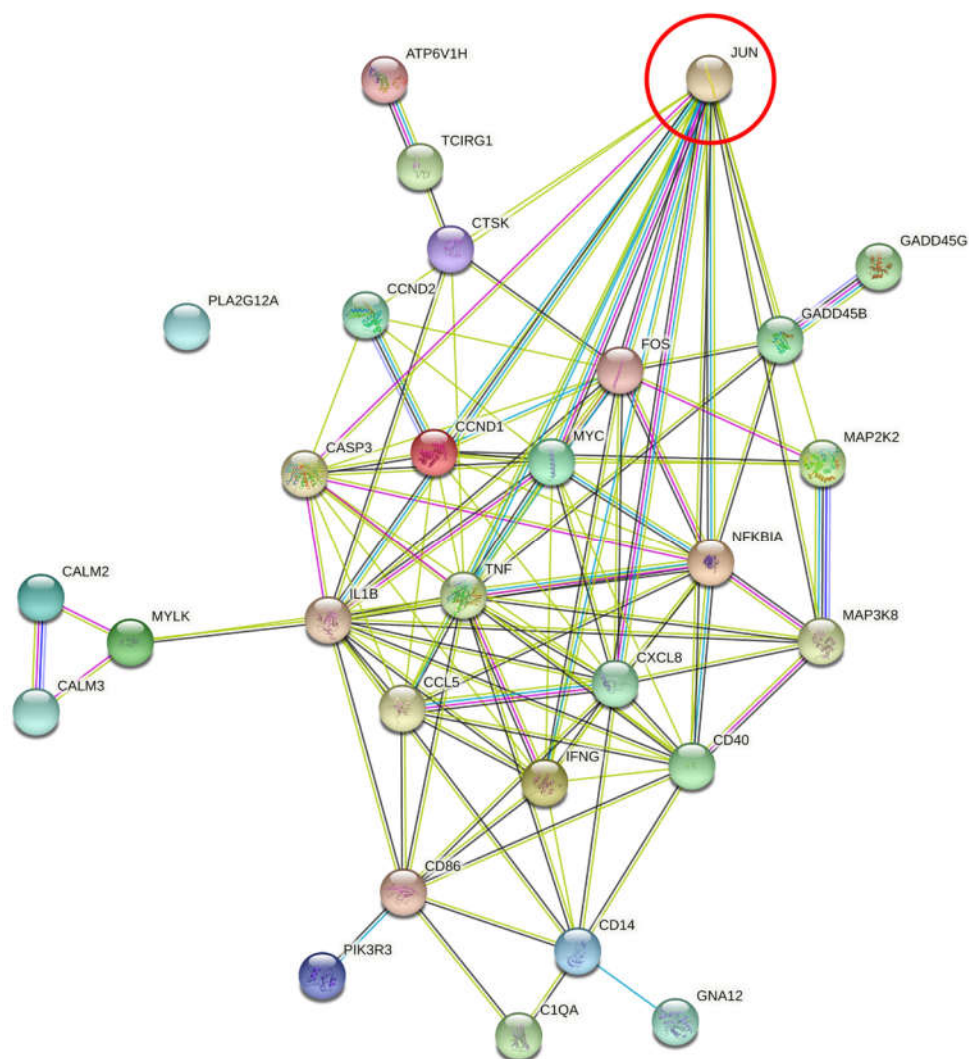

**Figure S7.** The protein-protein interaction of 29 differentially expressed genes in immature B cell. Every gene plays a role in at least two blood vessel and bone metabolism related signaling pathways, and *Jun* serves as a network hub.

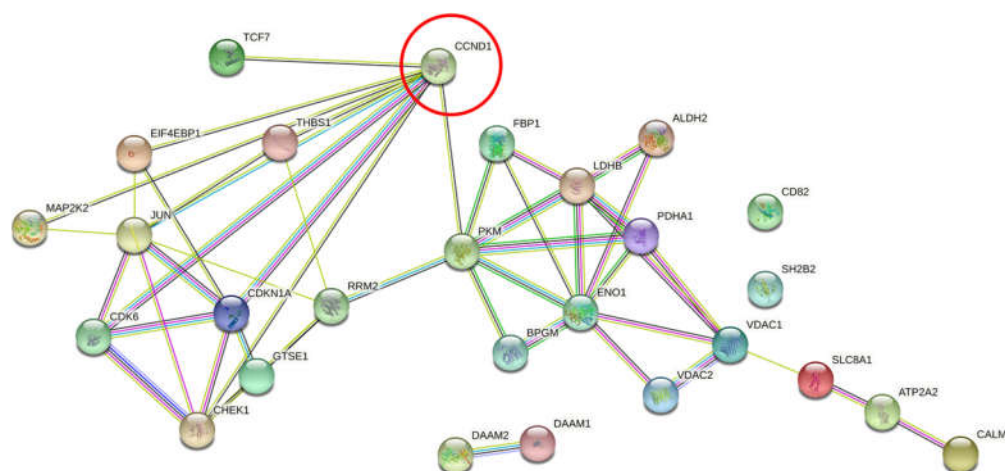

**Figure S8.** The protein-protein interaction of 27 differentially expressed genes in neutrophil. Every gene plays a role in blood vessel and bone metabolism related signaling pathways and *Ccnd1* served as the network hub.

**Table S1.** 65 glucocorticoid-associated dysregulated genes obtained from the intersection of Comparative Toxicogenomics Database and Gene Set Enrichment Analysis Database.

|          |        |          |        |        |       |
|----------|--------|----------|--------|--------|-------|
| BCL2     | NAP1L1 | RGS2     | CD99   | NASP   | RGCC  |
| LDHB     | PDLIM1 | HSP90AB1 | P2RX5  | SET    | NPM1  |
| JUN      | PPIA   | AREG     | SNRPD3 | LYZ    | IL1R2 |
| ANP32B   | LTF    | BIRC3    | OLA1   | ETFA   | EZR   |
| SSBP2    | MAP3K8 | HSPA8    | SSBP1  | RPLP0  | PRDX6 |
| BLNK     | AHNAK  | GAPDH    | TUFM   | PRDX4  | VDAC1 |
| CSTA     | AKAP12 | HSPB1    | SERBP1 | ALAS2  | STMN1 |
| MARCKSL1 | CD9    | DEFA4    | ST13   | TUBA1B | IDH2  |
| C1QBP    | FABP5  | DEFA1    | PSIP1  | PDIA6  | PRDX1 |
| DYNLL1   | G0S2   | APOBEC3G | CCT8   | DUT    | CXCL8 |
| PRMT1    | FOSB   | STOML2   | HMG2   | PARK7  |       |
